# Supplementary material
Source: Springer Nature journal article supplement (https://www.springermedizin.de/resource/supplementary/13051_2012_271_MOESM3_ESM.pdf/9670240)

## Commercial Insurance

Cost Burden= \$68,394  
( $P < 0.001$ )

## Medicare

Cost Burden= \$9,060  
( $P < 0.001$ )

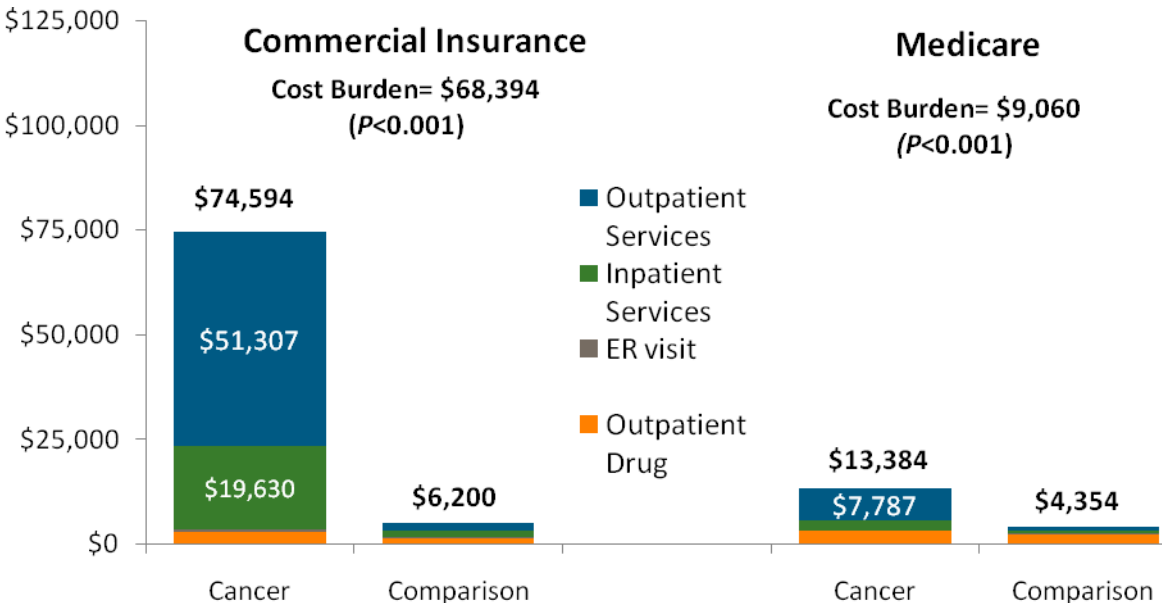

Supplement: MOESM3 [file 9670240]
